# Supplementary material
Source: PubMed Central journal article supplement (PMC3737718)
Supplement: supp_140.16.3360_DEV098533.pdf [file supp_140.16.3360_DEV098533.pdf]

**Table S1. Primers**

| Primer      | Sequence (5'-3')           |
|-------------|----------------------------|
| loxP5'_5F   | CGCAGAACAATAGGTGCTGAAATTAC |
| loxP5'_5R   | CTGACACTGAGAACCACAAACGGC   |
| loxP3'_3F   | CGGCTCAAAGCAGAGTGTCAGTC    |
| loxP3'_3R   | CCACAAC TTTCCCAGTTAGCTCTC  |
| Ag2         | CTGCTAACCATGTTTCATGCCT     |
| Cre1        | CCTGTTTTGCACGTTACCG        |
| Cre3        | ATGCTTCTGTCCGTTTGCCG       |
| P21_F       | TTGTCGCTGTCTTGCACTCT       |
| P21_R       | AATCTGTCAGGCTGGTCTGC       |
| Cyclin D1_F | TCGTGGCCTCTAAGATGAAGGA     |
| Cyclin D1_R | CCATTGTCAGCAGCTCCTC        |
| Gapdh_F     | GTGGAAGGGCTCATGACCA        |
| Gapdh_R     | GGATGCAGGGATGATGTTCT       |

**Table S2. Antibodies**

| <b>Name (host)</b>                                       | <b>Source</b>                         | <b>Application and dilution</b> |
|----------------------------------------------------------|---------------------------------------|---------------------------------|
| <b>PE-anti-<math>\beta</math>1 integrin (CD29) (rat)</b> | Biologend, #102207                    | FACS, 1:50                      |
| <b>Alexa 488 anti-insulin (sheep)</b>                    | Conjugated in house                   | FACS, 1:100                     |
| <b>Anti-<math>\beta</math>1 integrin (rat)</b>           | Millipore, #MAB1997                   | IHC, 1:50                       |
| <b>Anti-<math>\beta</math>1 integrin (mouse)</b>         | BD Transduction Laboratories, #610467 | WB, 1:1000                      |
| <b>Anti-insulin (sheep)</b>                              | Binding Site, #PC059.X                | IHC 1:1000                      |
| <b>Anti-glucagon (rabbit)</b>                            | Millipore, #AB932                     | IHC, 1:200                      |
| <b>Anti-BrdU (mouse)</b>                                 | Sigma-Aldrich, #8434                  | IHC, 1:100                      |
| <b>Anti-phospho ERK1/2 (rabbit)</b>                      | Cell Signaling, #4370                 | WB, 1:500                       |
| <b>Anti-phospho S473-AKT (rabbit)</b>                    | Cell Signaling, #4060                 | WB, 1:500                       |
| <b>Anti-<math>\alpha</math>-tubulin (rabbit)</b>         | Santa Cruz, #sc-5546                  | WB, 1:500                       |
| <b>Anti-PTEN (rabbit)</b>                                | Cell Signaling, #9552                 | WB, 1:200                       |
| <b>Anti-<math>\beta</math>-actin</b>                     | Sigma-Aldrich, #A1978                 | WB, 1:1000                      |

IHC, immunohistochemistry; FACS, fluorescence-activated cell sorting; WB, western blot.
